# Supplementary material for: Spin crossover complexes as building units of hydrogen-bonded nanoporous structures
Source: Royal Society of Chemistry journal article supplement (doi:10.1039/b911137a), 2009-01-01
Supplement: b911137a.pdf [file b911137a.pdf]

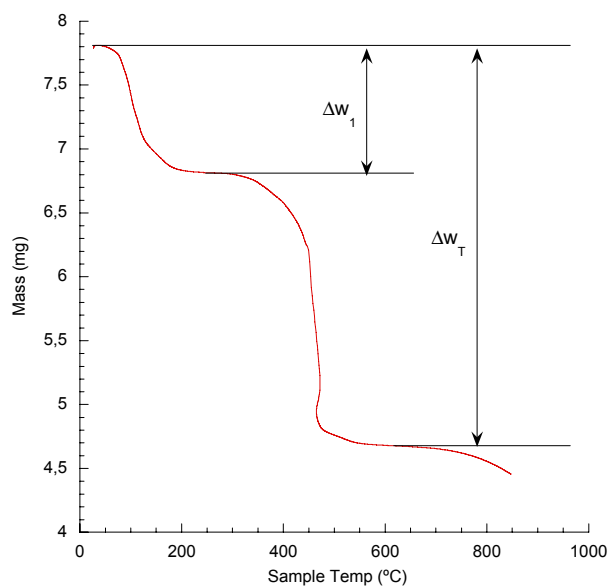

**Fig. S1.** TGA plot of  $\text{Ba}_3(\text{C}_9\text{H}_9\text{O}_6)_2 \cdot 8 \text{H}_2\text{O}$  showing the weight loss in two stages:  
 $\Delta w_1$ : 12.5 % (expected for loss of 8  $\text{H}_2\text{O}$  molecules: 15 %).  
 $\Delta w_T$ : 40 % (expected for total transformation into  $\text{BaCO}_3$ : 40 %).
